# Supplementary material for: Identification of a preferred DNA binding sequence and novel regulon member for CadR in Pseudomonas aeruginosa PAO1
Source: Front Microbiol. 2025 Jul 14;16:1608957. doi: 10.3389/fmicb.2025.1608957 (PMC12301328; doi:10.3389/fmicb.2025.1608957)
Supplement: Supplementary file 1 [file Table_1.XLSX]

## Sheet: Sheet1
	Plasmids used in this study				Primers for qPCR and genomic PCR				Primers for in vitro transcription (IVT)					Oligonucleotides
	Name	Information	Reference/Source		Figure Used	Name	Sequence		Figure Used	Amplicon Name	Name	Sequence		Figure Used	Name	Sequence
	pME6001	pME6000 derivative plasmid; gentamicin resistant	(Blumer et al., 1999)		Figure 3C	ChIP_CadA_L	GGCAGTACCGCTTGACTCTGTA		Figure S4A	Template 1	IVT_CadR/A_L1	GGTGCTCGTCGATCAACCGGT		Figures 1A and 1B	ST5R26	CAGCGTCAGATGTGTATAAGAGACAGNNNNNNNNNNNNNNNNNNNNNNNNNNCATCCCTCCAGAAGCTTGGAC
						ChIP_CadA_R	CGTGTTCGTGGCTCATGGAAAC				IVT_CadR/A_R1	GTTCCTCGGTCGGGCAGTCC		Figures 2A, 2B, 2D, 3A and S8	Control	CCTCTCTATGGGCAGTCGGTGATCTAGGAATTCGTGCAGAGGTGACGTCATAGAATTCGCATCCCTCCAGAAGCTTGGAC
	pME6001-CadR	pME6001 derivative carrying the PaCadR gene under its endogenous promoter; gentamicin resistant	(Ducret et al., 2020)		Figure 3C	ChIP_zrd_L	AGATCCAGACGAGAGGGTTGTG		Figures 3D, S4A and S4B	Template 2	IVT_CadR/A_L1	GGTGCTCGTCGATCAACCGGT
						ChIP_zrd_R	CACCGCCCTGTCCATGATGA				IVT_CadR/A_R2	GGTTGAATTCCAGCGACTCCACT		Figures 2A, 2B, 2D and S5A	ST2_CadR_WT	GAATTCGTGCAGAGGTGA AACCCTGTAGTTACTACAGGGTT CATCCCTCCAGAAGCTTG
	pME6001-HisCadR	pME6001 derivative carrying a 6xhistidine-tagged PaCadR gene under its endogenous promoter; gentamicin resistant	This study		Figure 3C	ChIP_16S_L	GTGGGAGAGGGTGGTGGAA		Figure S4B	Template 3	IVT_CadR/A_L2	CCAGCAGGGTACGGATTTCCT		Figure 2A	ST2_CadR_11_1_8	GAATTCGTGCAGAGGTGA AACCCTGTAGTTACTACAGGACG CATCCCTCCAGAAGCTTG
						ChIP_16S_R	CATCGTTTAGGGCGTGGACT				IVT_CadR/A_R2	GGTTGAATTCCAGCGACTCCACT			ST2_CadR_8_1_8	GAATTCGTGCAGAGGTGA CCTCCTGTAGTTACTACAGGACG CATCCCTCCAGAAGCTTG
					Figure 3E and Figure S11B	qPCR_CadR_L	GTGAGCTGGCGAAGAGAACC		Figure 3D	-	IVT_pqsA_L	AGCTATGGGGCATGTAGGTG		Figure 2D	ST2_CadR_mt1	GAATTCGTGCAGAGGTGA CACCCTGTAGTTACTACAGGGTG CATCCCTCCAGAAGCTTG
						qPCR_CadR_R	ATTGCCGATAGTTGCCTTCG				IVT_pqsA_R	GTCTGGCCCCGATAGTGATA			ST2_CadR_mt2	GAATTCGTGCAGAGGTGA ACCCCTGTAGTTACTACAGGGGT CATCCCTCCAGAAGCTTG
					Figure 3E and Figure S11A	qPCR_CadA_L	CGCATCGAAGCGATGGACT								ST2_CadR_mt3	GAATTCGTGCAGAGGTGA AAACCTGTAGTTACTACAGGTTT CATCCCTCCAGAAGCTTG
	Universal primers for template PCR					qPCR_CadA_R	GGCGCTGCATCAGGTTGAAT								ST2_CadR_mt4	GAATTCGTGCAGAGGTGA AACGCTGTAGTTACTACAGTGTT CATCCCTCCAGAAGCTTG
	Name	Sequence			Figures 3C, 3E, 4D, 4E, S11A and S11B	qPCR_aceE_L	CCATTCCGGTAACCCACGAA				Primers for iSeq100 barcodes				ST2_CadR_mt5	GAATTCGTGCAGAGGTGA AACCATGTAGTTACTACATGGTT CATCCCTCCAGAAGCTTG
	ST5L	CAGCGTCAGATGTGTATAAGAGACAG				qPCR_aceE_R	AGGCGAAGGTGGAGATGTGG				Name	Sequence			ST2_CadR_mt6	GAATTCGTGCAGAGGTGA AACCCAGTAGTTACTACTGGGTT CATCCCTCCAGAAGCTTG
	ST2R	GTCCAAGCTTCTGGAGGGATG			Figures 4D and 4E	qPCR_zrd_L	GTGGGCGTCATCATGGACAG				NT1L	TCGTCGGCAGCGTC AGATGTGTATAAGAGACAG			ST2_CadR_mt7	GAATTCGTGCAGAGGTGA AACCCTTTAGTTACTAAAGGGTT CATCCCTCCAGAAGCTTG
	ST2L	CTAGGAATTCGTGCAGAGGTGA				qPCR_zrd_R	CAGCCCTGGCAGAATCGTG				NT2_ST2R	GTCTCGTGGGCTCGG AGATGTGTATAAGAGACAG GTCCAAGCTTCTGGAGGGATG			ST2_CadR_mt8	GAATTCGTGCAGAGGTGA AACCCTGCAGTTACTCCAGGGTT CATCCCTCCAGAAGCTTG
	ConL	CCTCTCTATGGGCAGTCGGTCATCTAG			Figure S2	IVT_CadR/A_L1	GGTGCTCGTCGATCAACCGGT								ST2_CadR_mt9	GAATTCGTGCAGAGGTGA AACCCTGTTGTTACAACAGGGTT CATCCCTCCAGAAGCTTG
						IVT_CadR/A_R1	GTTCCTCGGTCGGGCAGTCC				P5_2i5_NT1	AATGATACGGCGACCACCGAGATCTACAC CTCTCTAT TCGTCGGCAGCGTC A			ST2_CadR_mt10	GAATTCGTGCAGAGGTGA AACCCTGTATTTAATACAGGGTT CATCCCTCCAGAAGCTTG
					Figure S2	gPCR_fur_L	GAGGTGGTCGGCGGCACTAG								ST2_CadR_mt11	GAATTCGTGCAGAGGTGA AACCCTGTAGATTCTACAGGGTT CATCCCTCCAGAAGCTTG
						gPCR_fur_R	ACGGGCGAATGGGTCATCGT				P7_2i7_NT2	CAAGCAGAAGACGGCATACGAGAT CTAGTACG GTCTCGTGGGCTCGG A			ST2_CadR_mt12	GAATTCGTGCAGAGGTGA AACCCTGTAGTGACTACAGGGTT CATCCCTCCAGAAGCTTG
															ST2_CadR_mt13	GAATTCGTGCAGAGGTGA AACCCTGTAGTACTACAGGGTT CATCCCTCCAGAAGCTTG
															ST2_CadR_mt14	GAATTCGTGCAGAGGTGA AACCCTGTAGTTTACTACAGGGTT CATCCCTCCAGAAGCTT
														Figure 3A	ST2_gDNA1_cadR/A	GGAATTCGTGCAGAGGTGA CACCCTGTAGCAACTACAGAGTC CATCCCTCCAGAAGCTTGG
															ST2_PA3689_gDNA2	GAATTCGTGCAGAGGTGA GACCCTGTAGTGGCTACAGCCTT CATCCCTCCAGAAGCTTG
														Figure S8	ST2_PA3689_gDNA3	GAATTCGTGCAGAGGTGA AGCTCTACAGCAACTACAGCTTC CATCCCTCCAGAAGCTTG
															ST2_PA3689_gDNA4	GAATTCGTGCAGAGGTGA GTCCTTGTAGGCAGTATAGGGAT CATCCCTCCAGAAGCTTG
															ST2_gDNA2_marR	GGAATTCGTGCAGAGGTGA AACGCTGGAGCGACTACGGATTC CATCCCTCCAGAAGCTTGG
															ST2_PA3689_gDNA6	GAATTCGTGCAGAGGTGA AACCCTCAACGACCTGCAGAGTG CATCCCTCCAGAAGCTTG
															ST2_PA3689_gDNA7	GAATTCGTGCAGAGGTGA TACCCTCTACGAAGTACAGCGCA CATCCCTCCAGAAGCTTG
